# Supplementary material
Source: publisher figshare collection journal article supplement (https://springernature.figshare.com/ndownloader/files/14145776)
Supplement: Supplementary file [file 14145776]

## Additional file 2: Overall mean IRR and validity % for GPP measures in Uganda.

| Type* | Domain** | Mean score of GPP measures                                               | Validity %      |                |                 | IRR %           |
|-------|----------|--------------------------------------------------------------------------|-----------------|----------------|-----------------|-----------------|
|       |          |                                                                          | Inspector       |                |                 |                 |
|       |          |                                                                          | District        | Central        | Overall         | Overall         |
|       |          | <b>Critical Measures</b>                                                 |                 |                |                 |                 |
| s     | P        | Wall are clean-dispensary                                                | 50%             | 63%            | 56%             | 63%             |
| s     | P        | Wall are clean-store                                                     | 67%             | 50%            | 58%             | 60%             |
| s     | P        | Roof is in good condition-dispensary                                     | 50%             | 75%            | 63%             | 63%             |
| s     | P        | Roof is in good condition-store                                          | 67%             | 100%           | 83%             | 67%             |
| o     | P        | Medicines protected from sun-dispensary                                  | 50%             | 57%            | 54%             | 71%             |
| o     | P        | Medicines protected from sun-store                                       | 100%            | 83%            | 92%             | 100%            |
| o     | P        | There is a functioning cold storage system                               | 80%             | 100%           | 90%             | 83%             |
| s     | P        | Toilets for staff are acceptable                                         | 14%             | 43%            | 29%             | 38%             |
| s     | P        | Hand washing facilities are acceptable                                   | 0%              | 38%            | 19%             | 29%             |
| o     | D        | Medicines are labelled correctly                                         | 67%             | 86%            | 76%             | 67%             |
|       |          | <b>Mean score for critical measures</b>                                  | <b>54%</b>      | <b>69%</b>     | <b>62%</b>      | <b>64%</b>      |
|       |          | <b>Number of critical measures with acceptable score (≥75%) # (%)</b>    | <b>2 (20%)</b>  | <b>5 (50%)</b> | <b>4 (40%)</b>  | <b>2 (20%)</b>  |
|       |          |                                                                          |                 |                |                 |                 |
|       |          | <b>Major Measures</b>                                                    |                 |                |                 |                 |
| s     | P        | Floors made materials easy to clean-dispensary                           | 88%             | 75%            | 81%             | 88%             |
| s     | P        | Floors made materials easy to clean-store                                | 33%             | 43%            | 38%             | 83%             |
| s     | P        | No signs of pests-dispensary                                             | 38%             | 50%            | 44%             | 38%             |
| s     | P        | No signs of pests-store                                                  | 33%             | 60%            | 47%             | 50%             |
| s     | P        | Store size is adequate with enough shelves and layout-dispensary         | 43%             | 43%            | 43%             | 75%             |
| s     | P        | Store size is adequate with enough shelves and layout-store              | 86%             | 71%            | 79%             | 86%             |
| s     | P        | Pharmacy/store lockable and limited access-dispensary                    | 71%             | 86%            | 79%             | 75%             |
| s     | P        | Pharmacy/store lockable and limited access-store                         | 86%             | 100%           | 93%             | 86%             |
| o     | D        | Appropriate packaging materials available                                | 100%            | 100%           | 100%            | 100%            |
| o     | D        | Tablet counting tray and spatula are available                           | 75%             | 63%            | 69%             | 88%             |
| o     | D        | Prescription recording system is available                               | 100%            | 100%           | 100%            | 100%            |
| o     | D        | Prescription recording system data is available                          | 75%             | 63%            | 69%             | 63%             |
| o     | S        | Medicine packs are stored only on shelves and cupboards - dispensary     | 20%             | 33%            | 27%             | 67%             |
| o     | S        | Medicine packs are stored only on shelves and cupboards - store          | 80%             | 71%            | 76%             | 100%            |
| o     | S        | Stock cards are available - store                                        | 100%            | 83%            | 92%             | 71%             |
| o     | S        | Stock cards are kept next to the medicines on shelves - store            | 71%             | 71%            | 71%             | 86%             |
| o     | S        | There is record of expired/damaged medicines and health supplies - store | 86%             | 86%            | 86%             | 71%             |
| o     | S        | There is a designated area to store expired/damaged medicines - store    | 71%             | 57%            | 64%             | 86%             |
| o     | S        | FEFO is adhered to - store                                               | 71%             | 57%            | 64%             | 71%             |
| o     | O        | Records kept for received items - HF                                     | 100%            | 100%           | 100%            | 100%            |
|       |          | <b>Mean score for major measures</b>                                     | <b>71%</b>      | <b>71%</b>     | <b>71%</b>      | <b>79%</b>      |
|       |          | <b>Number of major measures with acceptable score (≥75%) # (%)</b>       | <b>11 (55%)</b> | <b>8 (40%)</b> | <b>10 (50%)</b> | <b>13 (65%)</b> |

| Type*                                                                                                         | Domain** | Mean score of GPP measures                                                             | Validity %      |                 |                 | IRR %           |
|---------------------------------------------------------------------------------------------------------------|----------|----------------------------------------------------------------------------------------|-----------------|-----------------|-----------------|-----------------|
|                                                                                                               |          |                                                                                        | Inspector       |                 |                 |                 |
|                                                                                                               |          |                                                                                        | District        | Central         | Overall         | Overall         |
|                                                                                                               |          | <b>Minor Measures</b>                                                                  |                 |                 |                 |                 |
| o                                                                                                             | P        | Temperature is monitored-dispensary                                                    | 29%             | 29%             | 29%             | 75%             |
| o                                                                                                             | P        | Temperature is monitored-store                                                         | 67%             | 50%             | 58%             | 60%             |
| o                                                                                                             | P        | Temperature can be regulated-dispensary                                                | 86%             | 57%             | 71%             | 71%             |
| o                                                                                                             | P        | Temperature can be regulated-store                                                     | 80%             | 83%             | 82%             | 75%             |
| o                                                                                                             | P        | Space requirements OK-dispensary                                                       | 83%             | 80%             | 82%             | 67%             |
| o                                                                                                             | P        | Space requirements OK-store                                                            | 100%            | 80%             | 90%             | 83%             |
| s                                                                                                             | P        | Procedure to access office when store in-charge is absent-dispensary                   | 38%             | 63%             | 50%             | 25%             |
| s                                                                                                             | P        | Procedure to access office when store in-charge is absent-store                        | 33%             | 83%             | 58%             | 17%             |
| s                                                                                                             | P        | Premises are clean and tidy-dispensary                                                 | 38%             | 75%             | 56%             | 63%             |
| s                                                                                                             | P        | Premises are clean and tidy-dispensary-store                                           | 60%             | 100%            | 80%             | 50%             |
| o                                                                                                             | P        | Fire safety equipment is available                                                     | 57%             | 86%             | 71%             | 57%             |
| o                                                                                                             | P        | Temperature of the refrigerator is monitored and recorded daily                        | 75%             | 88%             | 81%             | 88%             |
| o                                                                                                             | D        | Tablet are not counted with bare hands but with counting tray                          | 63%             | 75%             | 69%             | 63%             |
| s                                                                                                             | D        | Counting trays and spatula or gloves are clean                                         | 13%             | 38%             | 25%             | 50%             |
| o                                                                                                             | D        | Provision for cleaning utensils with clean water                                       | 14%             | 25%             | 20%             | 29%             |
| s                                                                                                             | D        | Tins/bottles that have been opened are covered with lid                                | 71%             | 88%             | 79%             | 57%             |
| s                                                                                                             | D        | There is control of the prescription before dispensing                                 | 25%             | 38%             | 31%             | 13%             |
| s                                                                                                             | D        | There is control to countercheck the medicines dispensed                               | 14%             | 43%             | 29%             | 38%             |
| o                                                                                                             | D        | Privacy is achieved during dispensing                                                  | 50%             | 71%             | 61%             | 86%             |
| o                                                                                                             | D        | Chairs/benches are available for patients                                              | 100%            | 100%            | 100%            | 88%             |
| o                                                                                                             | D        | Hand washing facilities and soap available to patients                                 | 38%             | 63%             | 50%             | 63%             |
| o                                                                                                             | D        | Drinking water is available to patients                                                | 88%             | 88%             | 88%             | 75%             |
| o                                                                                                             | D        | A book for prescription for class A drugs available                                    | 100%            | 100%            | 100%            | 100%            |
| o                                                                                                             | D        | Prescription books are kept for minimum 5 yrs.                                         | 88%             | 88%             | 88%             | 100%            |
| o                                                                                                             | D        | All patients receiving dispensed prescription medicine are recorded                    | 83%             | 67%             | 75%             | 100%            |
| o                                                                                                             | D        | Customers know how to take medicines                                                   | 100%            | 83%             | 92%             | 100%            |
| o                                                                                                             | S        | Stock cards headers are filled correct with medicine data - store                      | 71%             | 71%             | 71%             | 100%            |
| o                                                                                                             | S        | Physical count done monthly and clearly indicated on card - store                      | 71%             | 43%             | 57%             | 71%             |
| o                                                                                                             | S        | Stock cards correctly updated so physical count and stock card balance is same - store | 71%             | 43%             | 57%             | 71%             |
| o                                                                                                             | S        | Medicine is stored in a systematic manner - dispensary                                 | 100%            | 33%             | 67%             | 50%             |
| o                                                                                                             | S        | Medicine is stored in a systematic manner - Store                                      | 67%             | 43%             | 55%             | 100%            |
| s                                                                                                             | S        | Shelves are labelled with medicine names or class - dispensary                         | 100%            | 67%             | 83%             | 50%             |
| o                                                                                                             | S        | Shelves are labelled with medicine names or class - store                              | 80%             | 57%             | 69%             | 80%             |
| o                                                                                                             | S        | Is the pharmacy or drug outlet computerised                                            | 86%             | 86%             | 86%             | 100%            |
| o                                                                                                             | O        | Latest reference material available - HF                                               | 100%            | 75%             | 88%             | 75%             |
| s                                                                                                             | O        | Does the drug outlet have written procedures - FH                                      | 0%              | 43%             | 21%             | 50%             |
| s                                                                                                             | O        | Do the records include key qualities                                                   | 50%             | 63%             | 56%             | 50%             |
|                                                                                                               |          | <b>Mean score for minor measures</b>                                                   | <b>65%</b>      | <b>67%</b>      | <b>66%</b>      | <b>67%</b>      |
|                                                                                                               |          | <b>Number of minor measures with acceptable score (≥75%) # (%)</b>                     | <b>16 (43%)</b> | <b>17 (46%)</b> | <b>15 (41%)</b> | <b>16 (43%)</b> |
| <b>Mean score for all measures</b>                                                                            |          |                                                                                        | <b>65%</b>      | <b>68%</b>      | <b>67%</b>      | <b>70%</b>      |
| <b>Total number of measure with acceptable score (≥75%)</b>                                                   |          |                                                                                        | <b>29 (43%)</b> | <b>30 (45%)</b> | <b>29 (43%)</b> | <b>31 (46%)</b> |
| <b>* o= Objective; s= subjective; ** P= Premises; D=Dispensing practice; S=Store management; O=Operations</b> |          |                                                                                        |                 |                 |                 |                 |

| Mean score of GPP measures                                               | Validity % |          |          | IRR %    |
|--------------------------------------------------------------------------|------------|----------|----------|----------|
|                                                                          | Inspector  |          |          |          |
|                                                                          | District   | Central  | Overall  | Overall  |
| <b>Domain</b>                                                            |            |          |          |          |
| <b>Premises ( n = 29)</b>                                                |            |          |          |          |
| Mean score for premises domain measures                                  | 59%        | 69%      | 64%      | 65%      |
| <i>Number of critical measures with acceptable score (≥75%) # (%)</i>    | 10 (35%)   | 15 (52%) | 12 (41%) | 12 (41%) |
| <b>Dispensing practice ( n = 19)</b>                                     |            |          |          |          |
| Mean score for Dispensing practice domain measures                       | 67%        | 72%      | 69%      | 72%      |
| <i>Number of critical measures with acceptable score (≥75%) # (%)</i>    | 10 (53%)   | 10 (53%) | 10 (53%) | 10 (53%) |
| <b>Store management ( n = 15)</b>                                        |            |          |          |          |
| Mean score for store management domain measures                          | 76%        | 60%      | 68%      | 78%      |
| <i>Number of critical measures with acceptable score (≥75%) # (%)</i>    | 7 (47%)    | 3 (20%)  | 5 (33%)  | 7 (47%)  |
| <b>Operations ( n = 4)</b>                                               |            |          |          |          |
| Mean score for operations domain measures                                | 63%        | 70%      | 66%      | 69%      |
| <i>Number of critical measures with acceptable score (≥75%) # (%)</i>    | 2 (50%)    | 2 (50%)  | 2 (50%)  | 2 (50%)  |
| <b>Level of Care</b>                                                     |            |          |          |          |
| <b>HC 2 ( n = 67)</b>                                                    |            |          |          |          |
| Mean score for HC 2 measures***                                          | 59%        | 65%      | 62%      | 67%      |
| <i>Number of critical measures with acceptable score (≥75%) # (%)***</i> | 27 (42%)   | 23 (35%) | 33 (50%) | 25 (39%) |
| <b>HC 3 ( n = 67)</b>                                                    |            |          |          |          |
| Mean score for HC 3 measures***                                          | 63%        | 68%      | 66%      | 63%      |
| <i>Number of critical measures with acceptable score (≥75%) # (%)***</i> | 28 (42%)   | 24 (36%) | 30 (46%) | 28 (42%) |
| <b>HC 4 ( n = 67)</b>                                                    |            |          |          |          |
| Mean score for HC 4 measures***                                          | 71%        | 69%      | 71%      | 81%      |
| <i>Number of critical measures with acceptable score (≥75%) # (%)***</i> | 39 (58%)   | 35 (52%) | 37 (55%) | 48 (75%) |
| ***Missing data is considered in the % calculations                      |            |          |          |          |
